# Supplementary material for: Assembly of Hepatocyte Spheroids Using Magnetic 3D Cell Culture for CYP450 Inhibition/Induction
Source: Int J Mol Sci. 2017 May 18;18(5):1085. doi: 10.3390/ijms18051085 (PMC5454994; doi:10.3390/ijms18051085)
Supplement: Supplementary file 1 [file ijms-18-01085-s001.pdf]

# Supplementary Materials: Assembly of Hepatocyte Spheroids Using Magnetic 3D Cell Culture for CYP450 Inhibition/Induction

Pujan K. Desai, Hubert Tseng and Glauco R. Souza

**Table S1.** *p*-Values for the effects of drugs and environment (2D v. 3D) on CYP activity.

|                          | 2D                    | 3D                    |
|--------------------------|-----------------------|-----------------------|
| CYP3A4                   |                       |                       |
| Rifampicin               | $2.1 \times 10^{-6}$  | $5.6 \times 10^{-5}$  |
| 2D v. 3D                 | $1.7 \times 10^{-4}$  |                       |
| Verapamil                | 0.048                 | $6.7 \times 10^{-12}$ |
| 2D v. 3D                 | $1.1 \times 10^{-16}$ |                       |
| CYP2B6                   |                       |                       |
| Rifampicin               | $3.2 \times 10^{-15}$ | $2.2 \times 10^{-16}$ |
| 2D v. 3D                 | 0                     |                       |
| Ticlopidine              | 0.26                  | 0.09                  |
| 2D v. 3D                 | 0                     |                       |
| CYP1A2                   |                       |                       |
| Omeprazole               | $1.1 \times 10^{-11}$ | $4.7 \times 10^{-5}$  |
| 2D v. 3D                 | $1.1 \times 10^{-5}$  |                       |
| $\alpha$ -Naphthoflavone | 0.0022                | $9.6 \times 10^{-7}$  |
| 2D v. 3D                 | 0                     |                       |

**Table S2.** *p*-values for the effects of drugs and environment (2D v. 3D) on viability.

|                          | 2D                    | 3D                    |
|--------------------------|-----------------------|-----------------------|
| Rifampicin               | 0.53                  | 0.30                  |
| 2D v. 3D                 | 0.15                  |                       |
| Verapamil                | 0.002                 | 0                     |
| 2D v. 3D                 | 0.03                  |                       |
| Rifampicin               | $3.8 \times 10^{-5}$  | $4.4 \times 10^{-15}$ |
| 2D v. 3D                 | 0.22                  |                       |
| Ticlopidine              | 0.86                  | $4.5 \times 10^{-5}$  |
| 2D v. 3D                 | 0.45                  |                       |
| Omeprazole               | $1.4 \times 10^{-11}$ | $9.3 \times 10^{-12}$ |
| 2D v. 3D                 | 0.054                 |                       |
| $\alpha$ -Naphthoflavone | 0.13                  | 0.12                  |
| 2D v. 3D                 | 0.46                  |                       |

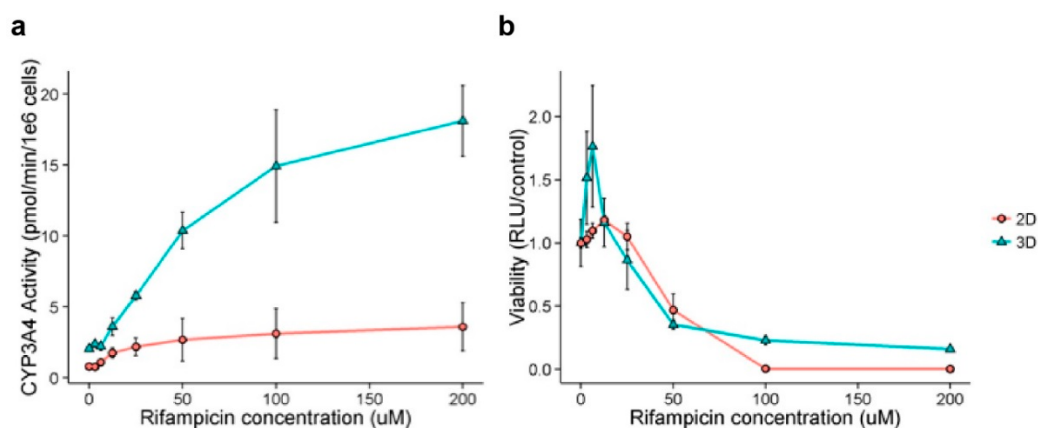

**Figure S1.** CYP3A4 activity and viability of iPS-hepatocytes after 72 h exposure to rifampicin. Human induced pluripotent stem cell-derived hepatocytes (iPS-hepatocytes, ReproCELL, Yokohama, Japan) were thawed and immediately either plated in 2D monolayers (75,000 cells/well, 96-well format) or printed into 3D spheroids (10,000 cells/spheroid, 384-well format) after 2 h incubation with the magnetic nanoparticles. iPS-hepatocytes were cultured for 24 h in thawing media and six days in maintenance media before replacing the maintenance media with a serum-free induction media containing rifampicin (0–200 μM) and a vehicle control (1% DMSO). After 72 h exposure to rifampicin and nine days after thaw, CYP3A4 activity and viability (ATP) were measured using luminescent assays on a plate reader. Spheroids show greater baseline and induced CYP3A4 activity than that of 2D monolayer culture ( $n = 3$ ,  $p < 0.001$  at 200 μM). Both cultures show cytotoxicity to high concentrations of rifampicin ( $n = 3$ ,  $p < 0.001$ ). Error bars represent standard error.
